# Supplementary material for: Parent-Reported Changes in Ontario Children’s Physical Activity Levels during the COVID-19 Pandemic
Source: Children (Basel). 2023 Jan 26;10(2):221. doi: 10.3390/children10020221 (PMC9954678; doi:10.3390/children10020221)
Supplement: Supplementary file 1 [file children-10-00221-s001.zip › children-2135034-supplementary.pdf]

**Supplementary File S1.** Items used for the present study from the *Return to Play* study surveys.

Baseline Survey Items

Q5.1 Please answer the following questions to provide some information about yourself.

Q5.2 What gender do you identify with? (Refers to **current gender** which may be different from sex assigned at birth and may be different from what is indicated on legal documents.)

- ☐ Male (1)
- ☐ Female (2)
- ☐ Prefer not to say (3)
- ☐ Prefer to self-describe: (4) \_\_\_\_\_
- 

Q5.3 What is **your age** (in years)?

\_\_\_\_\_

-----

Q5.4 What is your postal code? (e.g., 1A1 A1A)?

\_\_\_\_\_

-----

Q5.5 Which of the following best describes the area you live?

- ☐ Rural (1)
- ☐ Suburban (2)
- ☐ Urban (3)
-

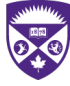

Q5.6 What is your racial background/ethnicity?

- ☐ Caucasian (1)
  - ☐ African Canadian (2)
  - ☐ South Asian (3)
  - ☐ East Asian (4)
  - ☐ Middle Eastern (5)
  - ☐ First Nations/Aboriginal (6)
  - ☐ Latin American (7)
  - ☐ Other: (8) \_\_\_\_\_
  - ☐ Prefer not to answer (9)
- 

Q5.7 What is your current employment status?

- ☐ Full-time (1)
  - ☐ Part-time (2)
  - ☐ Occasional/Support (3)
  - ☐ Unemployed (4)
  - ☐ Prefer not to answer (5)
-



Q5.8 What is your family situation?

- ☐ Single-parent (1)
  - ☐ Double-parent (2)
  - ☐ Guardian-led (3)
  - ☐ Other: (4) \_\_\_\_\_
  - ☐ Prefer not to answer (5)
- 

Q5.9 What is your highest level of education?

- ☐ High school (1)
  - ☐ College (2)
  - ☐ University (3)
  - ☐ Graduate school (4)
  - ☐ Prefer not to answer (5)
- 

Q5.10 In what housing type do you live (during the COVID-19 pandemic)?

- ☐ Apartment (1)
- ☐ Condominium (2)
- ☐ Townhouse (3)
- ☐ Semi-detached house (4)
- ☐ Detached house (5)
- ☐ Other housing? Please describe: (6) \_\_\_\_\_

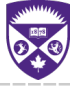

Q5.11 Do you have a dog?

- ☐ Yes (1)
- ☐ No (2)
- 

Q5.12 What is your approximate **yearly total household income (before taxes)**?

- ☐ Less than \$20,000 (1)
- ☐ \$20,000 - \$39,000 (2)
- ☐ \$40,000 - \$ 59,000 (3)
- ☐ \$60,000 - \$79,000 (4)
- ☐ \$80,000 - \$99,000 (5)
- ☐ \$100,000 - \$119,000 (6)
- ☐ \$120,000 - \$139,000 (7)
- ☐ More than \$140,000 (8)
- ☐ Prefer not to answer (9)
- 

Q5.13 Ontario is re-opening public spaces in three stages. What phase of re-opening are you **currently** in?

- ☐ Phase 1 re-opening (1)
- ☐ Phase 2 re-opening (2)
- ☐ Phase 3 re-opening (3)
-

Q5.14 How many children aged 0-12 years do you currently provide care for?

Click to write Choice 1 (1)

▼ 1 (1) ... 10 (10)

Display This Question:

If How many children aged 0-12 years do you currently provide care for? = 1

Q5.15 What is the current age (0-12 years) and sex at birth of your child?

|                   | Male (1)             | Female (2)           |
|-------------------|----------------------|----------------------|
| Age of child: (1) | <input type="text"/> | <input type="text"/> |

Display This Question:

If How many children aged 0-12 years do you currently provide care for? = 2

Q5.16 What is the current age (0-12 years) and sex at birth of your children? Please complete the fields below in order from **youngest to oldest.**

|                            | Male (1)             | Female (2)           |
|----------------------------|----------------------|----------------------|
| Child 1. Age of child: (1) | <input type="text"/> | <input type="text"/> |
| Child 2. Age of child: (2) | <input type="text"/> | <input type="text"/> |

Display This Question:

If How many children aged 0-12 years do you currently provide care for? = 3

Q5.17 What is the current age (0-12 years) and sex at birth of your children? Please complete fields below in order from youngest to oldest.

|                            | Male (1)                 | Female (2)               |
|----------------------------|--------------------------|--------------------------|
| Child 1. Age of child: (3) | <input type="checkbox"/> | <input type="checkbox"/> |
| Child 2. Age of child: (4) | <input type="checkbox"/> | <input type="checkbox"/> |
| Child 3. Age of child: (5) | <input type="checkbox"/> | <input type="checkbox"/> |

*Display This Question:*

*If How many children aged 0-12 years do you currently provide care for? = 4*

Q5.18 What is the current age (0-12 years) and sex at birth of your children? Please complete fields below in order from youngest to oldest.

|                            | Male (1)                 | Female (2)               |
|----------------------------|--------------------------|--------------------------|
| Child 1. Age of child: (1) | <input type="checkbox"/> | <input type="checkbox"/> |
| Child 2. Age of child: (2) | <input type="checkbox"/> | <input type="checkbox"/> |
| Child 3. Age of child: (3) | <input type="checkbox"/> | <input type="checkbox"/> |
| Child 4. Age of child: (4) | <input type="checkbox"/> | <input type="checkbox"/> |

*Display This Question:*

*If How many children aged 0-12 years do you currently provide care for? = 5*

Q5.19 What is the current age (0-12 years) and sex at birth of your children? Please complete fields below in order from youngest to oldest.

|                            | Male (1)                 | Female (2)               |
|----------------------------|--------------------------|--------------------------|
| Child 1. Age of child: (1) | <input type="checkbox"/> | <input type="checkbox"/> |
| Child 2. Age of child: (2) | <input type="checkbox"/> | <input type="checkbox"/> |
| Child 3. Age of child: (3) | <input type="checkbox"/> | <input type="checkbox"/> |
| Child 4. Age of child: (4) | <input type="checkbox"/> | <input type="checkbox"/> |
| Child 5. Age of child: (5) | <input type="checkbox"/> | <input type="checkbox"/> |

Display This Question:

If How many children aged 0-12 years do you currently provide care for? = 6

Q5.20 What is the current age (0-12 years) and sex at birth of your children? Please complete fields below in order from youngest to oldest.

|                            | Male (1)                 | Female (2)               |
|----------------------------|--------------------------|--------------------------|
| Child 1. Age of child: (1) | <input type="checkbox"/> | <input type="checkbox"/> |
| Child 2. Age of child: (2) | <input type="checkbox"/> | <input type="checkbox"/> |
| Child 3. Age of child: (3) | <input type="checkbox"/> | <input type="checkbox"/> |
| Child 4. Age of child: (4) | <input type="checkbox"/> | <input type="checkbox"/> |
| Child 5. Age of child: (5) | <input type="checkbox"/> | <input type="checkbox"/> |
| Child 6. Age of child: (6) | <input type="checkbox"/> | <input type="checkbox"/> |

*Display This Question:*

*If How many children aged 0-12 years do you currently provide care for? = 7*

Q5.21 What is the current age (0-12 years) and sex at birth of your children? Please complete fields below in order from youngest to oldest.

|                            | Male (1)                 | Female (2)               |
|----------------------------|--------------------------|--------------------------|
| Child 1. Age of child: (1) | <input type="checkbox"/> | <input type="checkbox"/> |
| Child 2. Age of child: (2) | <input type="checkbox"/> | <input type="checkbox"/> |
| Child 3. Age of child: (3) | <input type="checkbox"/> | <input type="checkbox"/> |
| Child 4. Age of child: (4) | <input type="checkbox"/> | <input type="checkbox"/> |
| Child 5. Age of child: (5) | <input type="checkbox"/> | <input type="checkbox"/> |
| Child 6. Age of child: (6) | <input type="checkbox"/> | <input type="checkbox"/> |
| Child 7. Age of child: (7) | <input type="checkbox"/> | <input type="checkbox"/> |

Display This Question:

If How many children aged 0-12 years do you currently provide care for? = 8

Q5.22 What is the current age (0-12 years) and sex at birth of your children? Please complete fields below in order from youngest to oldest.

|                            | Male (1)                 | Female (2)               |
|----------------------------|--------------------------|--------------------------|
| Child 1. Age of child: (1) | <input type="checkbox"/> | <input type="checkbox"/> |
| Child 2. Age of child: (2) | <input type="checkbox"/> | <input type="checkbox"/> |
| Child 3. Age of child: (3) | <input type="checkbox"/> | <input type="checkbox"/> |
| Child 4. Age of child: (4) | <input type="checkbox"/> | <input type="checkbox"/> |
| Child 5. Age of child: (5) | <input type="checkbox"/> | <input type="checkbox"/> |
| Child 6. Age of child: (6) | <input type="checkbox"/> | <input type="checkbox"/> |
| Child 7. Age of child: (7) | <input type="checkbox"/> | <input type="checkbox"/> |
| Child 8. Age of child: (8) | <input type="checkbox"/> | <input type="checkbox"/> |

Display This Question:

If How many children aged 0-12 years do you currently provide care for? = 9

Q5.23 What is the current age (0-12 years) and sex at birth of your children? Please complete fields below in order from youngest to oldest.

|                            | Male (1)                 | Female (2)               |
|----------------------------|--------------------------|--------------------------|
| Child 1. Age of child: (1) | <input type="checkbox"/> | <input type="checkbox"/> |
| Child 2. Age of child: (2) | <input type="checkbox"/> | <input type="checkbox"/> |
| Child 3. Age of child: (3) | <input type="checkbox"/> | <input type="checkbox"/> |
| Child 4. Age of child: (4) | <input type="checkbox"/> | <input type="checkbox"/> |
| Child 5. Age of child: (5) | <input type="checkbox"/> | <input type="checkbox"/> |
| Child 6. Age of child: (6) | <input type="checkbox"/> | <input type="checkbox"/> |
| Child 7. Age of child: (7) | <input type="checkbox"/> | <input type="checkbox"/> |
| Child 8. Age of child: (8) | <input type="checkbox"/> | <input type="checkbox"/> |
| Child 9. Age of child: (9) | <input type="checkbox"/> | <input type="checkbox"/> |

*Display This Question:*

*If How many children aged 0-12 years do you currently provide care for? = 10*

Q5.24 What is the current age (0-12 years) and sex at birth of your children? Please complete fields below in order from youngest to oldest.

|                              | Male (1)                 | Female (2)               |
|------------------------------|--------------------------|--------------------------|
| Child 1. Age of child: (1)   | <input type="checkbox"/> | <input type="checkbox"/> |
| Child 2. Age of child: (2)   | <input type="checkbox"/> | <input type="checkbox"/> |
| Child 3. Age of child: (3)   | <input type="checkbox"/> | <input type="checkbox"/> |
| Child 4. Age of child: (4)   | <input type="checkbox"/> | <input type="checkbox"/> |
| Child 5. Age of child: (5)   | <input type="checkbox"/> | <input type="checkbox"/> |
| Child 6. Age of child: (6)   | <input type="checkbox"/> | <input type="checkbox"/> |
| Child 7. Age of child: (7)   | <input type="checkbox"/> | <input type="checkbox"/> |
| Child 8. Age of child: (8)   | <input type="checkbox"/> | <input type="checkbox"/> |
| Child 9. Age of child: (9)   | <input type="checkbox"/> | <input type="checkbox"/> |
| Child 10. Age of child: (10) | <input type="checkbox"/> | <input type="checkbox"/> |

Q5.25 Does your child have a diagnosed disability or chronic condition?

☐ Yes (1)

☐ No (2)

Skip To: Q5.35 If Does your child have a diagnosed disability or chronic condition? = Yes

Skip To: End of Block If Does your child have a diagnosed disability or chronic condition? = No

Display This Question:

If How many children aged 0-12 years do you currently provide care for? = 2

Q5.26 Have any of your children been diagnosed with a disability or chronic condition? Please provide a response for each child. Please use the same order of children (youngest to oldest) as you have done in previous sections of the survey.

|             | Yes (1)                  | No (2)                   |
|-------------|--------------------------|--------------------------|
| Child 1 (1) | <input type="checkbox"/> | <input type="checkbox"/> |
| Child 2 (2) | <input type="checkbox"/> | <input type="checkbox"/> |

Skip To: End of Block If Have any of your children been diagnosed with a disability or chronic condition? Please provide a... [ No ] (Count) = 2

Display This Question:

If How many children aged 0-12 years do you currently provide care for? = 3

Q5.27 Have any of your children been diagnosed with a disability or chronic condition? Please provide a response for each child. Please use the same order of children (youngest to oldest) as you have done in previous sections of the survey.

|             | Yes (1)                  | No (2)                   |
|-------------|--------------------------|--------------------------|
| Child 1 (1) | <input type="checkbox"/> | <input type="checkbox"/> |
| Child 2 (2) | <input type="checkbox"/> | <input type="checkbox"/> |
| Child 3 (3) | <input type="checkbox"/> | <input type="checkbox"/> |

Skip To: End of Block If Have any of your children been diagnosed with a disability or chronic condition? Please provide a... [ No ] (Count) = 3

Display This Question:

If How many children aged 0-12 years do you currently provide care for? = 4

Q5.28 Have any of your children been diagnosed with a disability or chronic condition? Please provide a response for each child. Please use the same order of children (youngest to oldest) as you have done in previous sections of the survey.

|             | Yes (1)                  | No (2)                   |
|-------------|--------------------------|--------------------------|
| Child 1 (1) | <input type="checkbox"/> | <input type="checkbox"/> |
| Child 2 (2) | <input type="checkbox"/> | <input type="checkbox"/> |
| Child 3 (3) | <input type="checkbox"/> | <input type="checkbox"/> |
| Child 4 (4) | <input type="checkbox"/> | <input type="checkbox"/> |

Skip To: End of Block If Have any of your children been diagnosed with a disability or chronic condition? Please provide a... [ No] (Count) = 4

Display This Question:

If How many children aged 0-12 years do you currently provide care for? = 5

Q5.29 Have any of your children been diagnosed with a disability or chronic condition? Please provide a response for each child. Please use the same order of children (youngest to oldest) as you have done in previous sections of the survey.

|             | Yes (1)                  | No (2)                   |
|-------------|--------------------------|--------------------------|
| Child 1 (1) | <input type="checkbox"/> | <input type="checkbox"/> |
| Child 2 (2) | <input type="checkbox"/> | <input type="checkbox"/> |
| Child 3 (3) | <input type="checkbox"/> | <input type="checkbox"/> |
| Child 4 (4) | <input type="checkbox"/> | <input type="checkbox"/> |
| Child 5 (5) | <input type="checkbox"/> | <input type="checkbox"/> |

*Skip To: End of Block If Have any of your children been diagnosed with a disability or chronic condition? Please provide a... [ No] (Count) = 5*

*Display This Question:*

*If How many children aged 0-12 years do you currently provide care for? = 6*

Q5.30 Have any of your children been diagnosed with a disability or chronic condition? Please provide a response for each child. Please use the same order of children (youngest to oldest) as you have done in previous sections of the survey.

|             | Yes (1)               | No (2)                |
|-------------|-----------------------|-----------------------|
| Child 1 (1) | <input type="radio"/> | <input type="radio"/> |
| Child 2 (2) | <input type="radio"/> | <input type="radio"/> |
| Child 3 (3) | <input type="radio"/> | <input type="radio"/> |
| Child 4 (4) | <input type="radio"/> | <input type="radio"/> |
| Child 5 (5) | <input type="radio"/> | <input type="radio"/> |
| Child 6 (6) | <input type="radio"/> | <input type="radio"/> |

Skip To: End of Block If Have any of your children been diagnosed with a disability or chronic condition? Please provide a... [ No] (Count) = 6

Display This Question:

If How many children aged 0-12 years do you currently provide care for? = 7

Q5.31 Have any of your children been diagnosed with a disability or chronic condition? Please provide a response for each child. Please use the same order of children (youngest to oldest) as you have done in previous sections of the survey.

|             | Yes (1)                  | No (2)                   |
|-------------|--------------------------|--------------------------|
| Child 1 (1) | <input type="checkbox"/> | <input type="checkbox"/> |
| Child 2 (2) | <input type="checkbox"/> | <input type="checkbox"/> |
| Child 3 (3) | <input type="checkbox"/> | <input type="checkbox"/> |
| Child 4 (4) | <input type="checkbox"/> | <input type="checkbox"/> |
| Child 5 (5) | <input type="checkbox"/> | <input type="checkbox"/> |
| Child 6 (6) | <input type="checkbox"/> | <input type="checkbox"/> |
| Child 7 (7) | <input type="checkbox"/> | <input type="checkbox"/> |

Skip To: End of Block If Have any of your children been diagnosed with a disability or chronic condition? Please provide a... [ No] (Count) = 7

Display This Question:

If How many children aged 0-12 years do you currently provide care for? = 8

Q5.32 Have any of your children been diagnosed with a disability or chronic condition? Please provide a response for each child. Please use the same order of children (youngest to oldest) as you have done in previous sections of the survey.

|             | Yes (1)                  | No (2)                   |
|-------------|--------------------------|--------------------------|
| Child 1 (1) | <input type="checkbox"/> | <input type="checkbox"/> |
| Child 2 (2) | <input type="checkbox"/> | <input type="checkbox"/> |
| Child 3 (3) | <input type="checkbox"/> | <input type="checkbox"/> |
| Child 4 (4) | <input type="checkbox"/> | <input type="checkbox"/> |
| Child 5 (5) | <input type="checkbox"/> | <input type="checkbox"/> |
| Child 6 (6) | <input type="checkbox"/> | <input type="checkbox"/> |
| Child 7 (7) | <input type="checkbox"/> | <input type="checkbox"/> |
| Child 8 (8) | <input type="checkbox"/> | <input type="checkbox"/> |

*Skip To: End of Block If Have any of your children been diagnosed with a disability or chronic condition? Please provide a... [ No] (Count) = 8*

*Display This Question:*

*If How many children aged 0-12 years do you currently provide care for? = 9*

Q5.33 Have any of your children been diagnosed with a disability or chronic condition? Please provide a response for each child. Please use the same order of children (youngest to oldest) as you have done in previous sections of the survey.

|             | Yes (1)                  | No (2)                   |
|-------------|--------------------------|--------------------------|
| Child 1 (1) | <input type="checkbox"/> | <input type="checkbox"/> |
| Child 2 (2) | <input type="checkbox"/> | <input type="checkbox"/> |
| Child 3 (3) | <input type="checkbox"/> | <input type="checkbox"/> |
| Child 4 (4) | <input type="checkbox"/> | <input type="checkbox"/> |
| Child 5 (5) | <input type="checkbox"/> | <input type="checkbox"/> |
| Child 6 (6) | <input type="checkbox"/> | <input type="checkbox"/> |
| Child 7 (7) | <input type="checkbox"/> | <input type="checkbox"/> |
| Child 8 (8) | <input type="checkbox"/> | <input type="checkbox"/> |
| Child 9 (9) | <input type="checkbox"/> | <input type="checkbox"/> |

*Skip To: End of Block If Have any of your children been diagnosed with a disability or chronic condition? Please provide a... [ No] (Count) = 9*

*Display This Question:*

*If How many children aged 0-12 years do you currently provide care for? = 10*

Q5.34 Have any of your children been diagnosed with a disability or chronic condition? Please provide a response for each child. Please use the same order of children (youngest to oldest) as you have done in previous sections of the survey.

|               | Yes (1)                  | No (2)                   |
|---------------|--------------------------|--------------------------|
| Child 1 (1)   | <input type="checkbox"/> | <input type="checkbox"/> |
| Child 2 (2)   | <input type="checkbox"/> | <input type="checkbox"/> |
| Child 3 (3)   | <input type="checkbox"/> | <input type="checkbox"/> |
| Child 4 (4)   | <input type="checkbox"/> | <input type="checkbox"/> |
| Child 5 (5)   | <input type="checkbox"/> | <input type="checkbox"/> |
| Child 6 (6)   | <input type="checkbox"/> | <input type="checkbox"/> |
| Child 7 (7)   | <input type="checkbox"/> | <input type="checkbox"/> |
| Child 8 (8)   | <input type="checkbox"/> | <input type="checkbox"/> |
| Child 9 (9)   | <input type="checkbox"/> | <input type="checkbox"/> |
| Child 10 (10) | <input type="checkbox"/> | <input type="checkbox"/> |

*Skip To: End of Block If Have any of your children been diagnosed with a disability or chronic condition? Please provide a... [ No] (Count) = 10*

*Display This Question:*

*If How many children aged 0-12 years do you currently provide care for? = 1*

Q6.24 In your opinion, how **many minutes per day** did your child spend **engaged in physical activity prior to the COVID-19 pandemic?**

- ☐ Less than 30 minutes per day (1)
- ☐ 30-59 minutes per day (2)
- ☐ 60-149 minutes per day (3)
- ☐ 150 minutes or more per day (4)

*Display This Question:*

*If How many children aged 0-12 years do you currently provide care for? = 2*

Q6.25 In your opinion, how **many minutes per day** did your child(ren) spend **engaged in physical activity prior to the COVID-19 pandemic?**

|                                     | Child 1 (1)              | Child 2 (2)              |
|-------------------------------------|--------------------------|--------------------------|
| Less than 30 minutes per day<br>(1) | <input type="checkbox"/> | <input type="checkbox"/> |
| 30-59 minutes per day (2)           | <input type="checkbox"/> | <input type="checkbox"/> |
| 60-149 minutes per day (3)          | <input type="checkbox"/> | <input type="checkbox"/> |
| 150 minutes or more per day<br>(4)  | <input type="checkbox"/> | <input type="checkbox"/> |

*Display This Question:*

*If How many children aged 0-12 years do you currently provide care for? = 3*

Q6.26 In your opinion, how **many minutes per day** did your child(ren) spend **engaged in physical activity prior to the COVID-19 pandemic?**

|                                  | Child 1 (1)              | Child 2 (2)              | Child 3 (3)              |
|----------------------------------|--------------------------|--------------------------|--------------------------|
| Less than 30 minutes per day (1) | <input type="checkbox"/> | <input type="checkbox"/> | <input type="checkbox"/> |
| 30-59 minutes per day (2)        | <input type="checkbox"/> | <input type="checkbox"/> | <input type="checkbox"/> |
| 60-149 minutes per day (3)       | <input type="checkbox"/> | <input type="checkbox"/> | <input type="checkbox"/> |
| 150 minutes or more per day (4)  | <input type="checkbox"/> | <input type="checkbox"/> | <input type="checkbox"/> |

*Display This Question:*

*If How many children aged 0-12 years do you currently provide care for? = 4*

Q6.27 In your opinion, how **many minutes per day** did your child(ren) spend **engaged in physical activity prior to the COVID-19 pandemic?**

|                                  | Child 1 (1)              | Child 2 (2)              | Child 3 (3)              | Child 4 (4)              |
|----------------------------------|--------------------------|--------------------------|--------------------------|--------------------------|
| Less than 30 minutes per day (1) | <input type="checkbox"/> | <input type="checkbox"/> | <input type="checkbox"/> | <input type="checkbox"/> |
| 30-59 minutes per day (2)        | <input type="checkbox"/> | <input type="checkbox"/> | <input type="checkbox"/> | <input type="checkbox"/> |
| 60-149 minutes per day (3)       | <input type="checkbox"/> | <input type="checkbox"/> | <input type="checkbox"/> | <input type="checkbox"/> |
| 150 minutes or more per day (4)  | <input type="checkbox"/> | <input type="checkbox"/> | <input type="checkbox"/> | <input type="checkbox"/> |

*Display This Question:*

*If How many children aged 0-12 years do you currently provide care for? = 5*

Q6.28 In your opinion, how many minutes per day did your child(ren) spend engaged in physical activity prior to the COVID-19 pandemic?

|                                  | Child 1 (1)              | Child 2 (2)              | Child 3 (3)              | Child 4 (4)              | Child 5 (5)              |
|----------------------------------|--------------------------|--------------------------|--------------------------|--------------------------|--------------------------|
| Less than 30 minutes per day (1) | <input type="checkbox"/> |
| 30-59 minutes per day (2)        | <input type="checkbox"/> |
| 60-149 minutes per day (3)       | <input type="checkbox"/> |
| 150 minutes or more per day (4)  | <input type="checkbox"/> |

*Display This Question:*

Q6.29 In your opinion, how **many minutes per day** did your child(ren) spend **engaged in physical activity prior to the COVID-19 pandemic?**

[illegible]

Display This Question:

If How many children aged 0-12 years do you currently provide care for? = 7

Q6.30 In your opinion, how **many minutes per day** did your child(ren) spend **engaged in physical activity prior to the COVID-19 pandemic?**

|                                  | Child 1 (1)              | Child 2 (2)              | Child 3 (3)              | Child 4 (4)              | Child 5 (5)              | Child 6 (6)              | Child 7 (7)              |
|----------------------------------|--------------------------|--------------------------|--------------------------|--------------------------|--------------------------|--------------------------|--------------------------|
| Less than 30 minutes per day (1) | <input type="checkbox"/> |
| 30-59 minutes per day (2)        | <input type="checkbox"/> |
| 60-149 minutes per day (3)       | <input type="checkbox"/> |
| 150 minutes or more per day (4)  | <input type="checkbox"/> |

Display This Question:

If How many children aged 0-12 years do you currently provide care for? = 8

Q6.31 In your opinion, how **many minutes per day** did your child(ren) spend **engaged in physical activity prior to the COVID-19 pandemic?**

|                                  | Child 1<br>(1)           | Child 2<br>(2)           | Child 3<br>(3)           | Child 4<br>(4)           | Child 5<br>(5)           | Child 6<br>(6)           | Child 7<br>(7)           | Child 8<br>(8)           |
|----------------------------------|--------------------------|--------------------------|--------------------------|--------------------------|--------------------------|--------------------------|--------------------------|--------------------------|
| Less than 30 minutes per day (1) | <input type="checkbox"/> |
| 30-59 minutes per day (2)        | <input type="checkbox"/> |
| 60-149 minutes per day (3)       | <input type="checkbox"/> |
| 150 minutes or more per day (4)  | <input type="checkbox"/> |

Display This Question:

If How many children aged 0-12 years do you currently provide care for? = 9

Q6.32 In your opinion, how **many minutes per day** did your child(ren) spend **engaged in physical activity prior to the COVID-19 pandemic?**

|                                  | Child 1<br>(1)           | Child 2<br>(2)           | Child 3<br>(3)           | Child 4<br>(4)           | Child 5<br>(5)           | Child 6<br>(6)           | Child 7<br>(7)           | Child 8<br>(8)           | Child 9<br>(9)           |
|----------------------------------|--------------------------|--------------------------|--------------------------|--------------------------|--------------------------|--------------------------|--------------------------|--------------------------|--------------------------|
| Less than 30 minutes per day (1) | <input type="checkbox"/> |
| 30-59 minutes per day (2)        | <input type="checkbox"/> |
| 60-149 minutes per day (3)       | <input type="checkbox"/> |
| 150 minutes or more per day (4)  | <input type="checkbox"/> |

*Display This Question:*

*If How many children aged 0-12 years do you currently provide care for? = 10*

Q6.33 In your opinion, how many minutes per day did your child(ren) spend engaged in physical activity prior to the COVID-19 pandemic?

[illegible]

## 1-Year Follow-Up Survey Items

*Display This Question:*

*If How many children aged 0-13 years do you currently provide care for? = 1*

Q5.10 In your opinion, **how many minutes per day** did your child spend engaged in physical activity during Ontario's **strictest COVID-19 related lockdowns** (when sport and neighbourhood closures were in effect; March 2020- June 2020; January 2021 - May 2021)?

- ☐ Less than 30 minutes per day (1)
- ☐ 30-59 minutes per day (2)
- ☐ 60-149 minutes per day (3)
- ☐ 150 minutes or more per day (4)

*Display This Question:*

*If How many children aged 0-13 years do you currently provide care for? = 1*

Q5.11 In your opinion, how many **minutes per day** is your child engaging in physical activity **currently (i.e., at this moment in time)?**

- ☐ Less than 30 minutes per day (1)
- ☐ 30-59 minutes per day (2)
- ☐ 60-149 minutes per day (3)
- ☐ 150 minutes or more per day (4)

*Display This Question:*

*If How many children aged 0-13 years do you currently provide care for? = 2*

Q5.12 In your opinion, **how many minutes per day** did your children spend engaged in physical activity during Ontario's **strictest COVID-19 related lockdowns** (when sport and neighbourhood

closures were in effect; March 2020- June 2020; January 2021 - May 2021)? **Please respond as you have in previous questions of the survey, from YOUNGEST to OLDEST.**

|             | Less than 30<br>minutes per day<br>(1) | 30-59 minutes per<br>day (2) | 60-149 minutes<br>per day (4) | 150 minutes or<br>more per day (5) |
|-------------|----------------------------------------|------------------------------|-------------------------------|------------------------------------|
| Child 1 (1) | <input type="radio"/>                  | <input type="radio"/>        | <input type="radio"/>         | <input type="radio"/>              |
| Child 2 (2) | <input type="radio"/>                  | <input type="radio"/>        | <input type="radio"/>         | <input type="radio"/>              |

*Display This Question:*

*If How many children aged 0-13 years do you currently provide care for? = 2*

Q5.13 In your opinion, how many **minutes per day** are your children engaging in physical activity **currently (i.e., at this moment in time)? Please respond as you have in previous questions of the survey, from YOUNGEST to OLDEST.**

|             | Less than 30<br>minutes per day<br>(1) | 30-59 minutes per<br>day (2) | 60-149 minutes<br>per day (4) | 150 minutes or<br>more per day (6) |
|-------------|----------------------------------------|------------------------------|-------------------------------|------------------------------------|
| Child 1 (1) | <input type="radio"/>                  | <input type="radio"/>        | <input type="radio"/>         | <input type="radio"/>              |
| Child 2 (2) | <input type="radio"/>                  | <input type="radio"/>        | <input type="radio"/>         | <input type="radio"/>              |

*Display This Question:*

*If How many children aged 0-13 years do you currently provide care for? = 3*

Q5.14 In your opinion, **how many minutes per day** did your children spend engaged in physical activity during Ontario's **strictest COVID-19 related lockdowns** (when sport and neighbourhood

closures were in effect; March 2020- June 2020; January 2021 - May 2021)? **Please respond as you have in previous questions of the survey, from YOUNGEST to OLDEST.**

|             | Less than 30<br>minutes per day<br>(1) | 30-59 minutes per<br>day (2) | 60-149 minutes<br>per day (4) | 150 minutes or<br>more per day (5) |
|-------------|----------------------------------------|------------------------------|-------------------------------|------------------------------------|
| Child 1 (1) | <input type="radio"/>                  | <input type="radio"/>        | <input type="radio"/>         | <input type="radio"/>              |
| Child 2 (6) | <input type="radio"/>                  | <input type="radio"/>        | <input type="radio"/>         | <input type="radio"/>              |
| Child 3 (7) | <input type="radio"/>                  | <input type="radio"/>        | <input type="radio"/>         | <input type="radio"/>              |

*Display This Question:*

*If How many children aged 0-13 years do you currently provide care for? = 3*

Q5.15 In your opinion, how many **minutes per day** are your children engaging in physical activity **currently (i.e., at this moment in time)**? **Please respond as you have in previous questions of the survey, from YOUNGEST to OLDEST.**

|             | Less than 30<br>minutes per day<br>(1) | 30-59 minutes per<br>day (2) | 60-149 minutes<br>per day (4) | 150 minutes or<br>more per day (5) |
|-------------|----------------------------------------|------------------------------|-------------------------------|------------------------------------|
| Child 1 (1) | <input type="radio"/>                  | <input type="radio"/>        | <input type="radio"/>         | <input type="radio"/>              |
| Child 2 (2) | <input type="radio"/>                  | <input type="radio"/>        | <input type="radio"/>         | <input type="radio"/>              |
| Child 3 (3) | <input type="radio"/>                  | <input type="radio"/>        | <input type="radio"/>         | <input type="radio"/>              |

*Display This Question:*

*If How many children aged 0-13 years do you currently provide care for? = 4*

Q5.16 In your opinion, **how many minutes per day** did your children spend engaged in physical activity during Ontario's **strictest COVID-19 related lockdowns** (when sport and neighbourhood

closures were in effect; March 2020- June 2020; January 2021 - May 2021)? **Please respond as you have in previous questions of the survey, from YOUNGEST to OLDEST.**

|             | Less than 30<br>minutes per day<br>(1) | 30-59 minutes per<br>day (2) | 60-149 minutes<br>per day (4) | More than 150<br>minutes per day<br>(5) |
|-------------|----------------------------------------|------------------------------|-------------------------------|-----------------------------------------|
| Child 1 (1) | <input type="radio"/>                  | <input type="radio"/>        | <input type="radio"/>         | <input type="radio"/>                   |
| Child 2 (2) | <input type="radio"/>                  | <input type="radio"/>        | <input type="radio"/>         | <input type="radio"/>                   |
| Child 3 (3) | <input type="radio"/>                  | <input type="radio"/>        | <input type="radio"/>         | <input type="radio"/>                   |
| Child 4 (4) | <input type="radio"/>                  | <input type="radio"/>        | <input type="radio"/>         | <input type="radio"/>                   |

*Display This Question:*

*If How many children aged 0-13 years do you currently provide care for? = 4*

**Q5.17** In your opinion, how many **minutes per day** are your children engaging in physical activity **currently (i.e., at this moment in time)**? **Please respond as you have in previous questions of the survey, from YOUNGEST to OLDEST.**

|             | Less than 30<br>minutes per day<br>(1) | 30-59 minutes per<br>day (2) | 60-149 minutes<br>per day (4) | 150 minutes or<br>more per day (5) |
|-------------|----------------------------------------|------------------------------|-------------------------------|------------------------------------|
| Child 1 (1) | <input type="radio"/>                  | <input type="radio"/>        | <input type="radio"/>         | <input type="radio"/>              |
| Child 2 (2) | <input type="radio"/>                  | <input type="radio"/>        | <input type="radio"/>         | <input type="radio"/>              |
| Child 3 (3) | <input type="radio"/>                  | <input type="radio"/>        | <input type="radio"/>         | <input type="radio"/>              |
| Child 4 (4) | <input type="radio"/>                  | <input type="radio"/>        | <input type="radio"/>         | <input type="radio"/>              |

Display This Question:

If How many children aged 0-13 years do you currently provide care for? = 5

Q5.18 In your opinion, **how many minutes per day** did your children spend engaged in physical activity during Ontario's **strictest COVID-19 related lockdowns** (when sport and neighbourhood closures were in effect; March 2020- June 2020; January 2021 - May 2021)? **Please respond as you have in previous questions of the survey, from YOUNGEST to OLDEST.**

|             | Less than 30<br>minutes per day<br>(1) | 30-59 minutes per<br>day (2) | 60-149 minutes<br>per day (4) | 150 minutes or<br>more per day (5) |
|-------------|----------------------------------------|------------------------------|-------------------------------|------------------------------------|
| Child 1 (1) | <input type="radio"/>                  | <input type="radio"/>        | <input type="radio"/>         | <input type="radio"/>              |
| Child 2 (2) | <input type="radio"/>                  | <input type="radio"/>        | <input type="radio"/>         | <input type="radio"/>              |
| Child 3 (3) | <input type="radio"/>                  | <input type="radio"/>        | <input type="radio"/>         | <input type="radio"/>              |
| Child 4 (4) | <input type="radio"/>                  | <input type="radio"/>        | <input type="radio"/>         | <input type="radio"/>              |
| Child 5 (5) | <input type="radio"/>                  | <input type="radio"/>        | <input type="radio"/>         | <input type="radio"/>              |

Display This Question:

If How many children aged 0-13 years do you currently provide care for? = 5

**Q5.19** In your opinion, how many **minutes per day** are your children engaging in physical activity **currently (i.e., at this moment in time)**? Please respond as you have in previous questions of the survey, from **YOUNGEST** to **OLDEST**.

|             | Less than 30<br>minutes per day<br>(1) | 30-59 minutes per<br>day (2) | 60-149 minutes<br>per day (4) | 150 minutes or<br>more per day (5) |
|-------------|----------------------------------------|------------------------------|-------------------------------|------------------------------------|
| Child 1 (1) | <input type="radio"/>                  | <input type="radio"/>        | <input type="radio"/>         | <input type="radio"/>              |
| Child 2 (2) | <input type="radio"/>                  | <input type="radio"/>        | <input type="radio"/>         | <input type="radio"/>              |
| Child 3 (3) | <input type="radio"/>                  | <input type="radio"/>        | <input type="radio"/>         | <input type="radio"/>              |
| Child 4 (4) | <input type="radio"/>                  | <input type="radio"/>        | <input type="radio"/>         | <input type="radio"/>              |
| Child 5 (5) | <input type="radio"/>                  | <input type="radio"/>        | <input type="radio"/>         | <input type="radio"/>              |

*Display This Question:*

*If How many children aged 0-13 years do you currently provide care for? = 6*

**Q5.20** In your opinion, **how many minutes per day** did your children spend engaged in physical activity during Ontario's **strictest COVID-19 related lockdowns** (when sport and neighbourhood

closures were in effect; March 2020- June 2020; January 2021 - May 2021)? **Please respond as you have in previous questions of the survey, from YOUNGEST to OLDEST.**

|             | Less than 30<br>minutes per day<br>(1) | 30-59 minutes per<br>day (2) | 60-149 minutes<br>per day (4) | 150 minutes or<br>more per day (5) |
|-------------|----------------------------------------|------------------------------|-------------------------------|------------------------------------|
| Child 1 (1) | <input type="radio"/>                  | <input type="radio"/>        | <input type="radio"/>         | <input type="radio"/>              |
| Child 2 (2) | <input type="radio"/>                  | <input type="radio"/>        | <input type="radio"/>         | <input type="radio"/>              |
| Child 3 (3) | <input type="radio"/>                  | <input type="radio"/>        | <input type="radio"/>         | <input type="radio"/>              |
| Child 4 (4) | <input type="radio"/>                  | <input type="radio"/>        | <input type="radio"/>         | <input type="radio"/>              |
| Child 5 (5) | <input type="radio"/>                  | <input type="radio"/>        | <input type="radio"/>         | <input type="radio"/>              |
| Child 6 (6) | <input type="radio"/>                  | <input type="radio"/>        | <input type="radio"/>         | <input type="radio"/>              |

*Display This Question:*

*If How many children aged 0-13 years do you currently provide care for? = 6*

**Q5.21** In your opinion, how many **minutes per day** are your children engaging in physical activity **currently (i.e., at this moment in time)**? Please respond as you have in previous questions of the survey, from **YOUNGEST** to **OLDEST**.

|             | Less than 30<br>minutes per day<br>(1) | 30-59 minutes per<br>day (2) | 60-149 minutes<br>per day (4) | 150 minutes or<br>more per day (5) |
|-------------|----------------------------------------|------------------------------|-------------------------------|------------------------------------|
| Child 1 (1) | <input type="radio"/>                  | <input type="radio"/>        | <input type="radio"/>         | <input type="radio"/>              |
| Child 2 (2) | <input type="radio"/>                  | <input type="radio"/>        | <input type="radio"/>         | <input type="radio"/>              |
| Child 3 (3) | <input type="radio"/>                  | <input type="radio"/>        | <input type="radio"/>         | <input type="radio"/>              |
| Child 4 (4) | <input type="radio"/>                  | <input type="radio"/>        | <input type="radio"/>         | <input type="radio"/>              |
| Child 5 (5) | <input type="radio"/>                  | <input type="radio"/>        | <input type="radio"/>         | <input type="radio"/>              |
| Child 6 (6) | <input type="radio"/>                  | <input type="radio"/>        | <input type="radio"/>         | <input type="radio"/>              |

*Display This Question:*

*If How many children aged 0-13 years do you currently provide care for? = 7*

**Q5.22** In your opinion, **how many minutes per day** did your children spend engaged in physical activity during Ontario's **strictest COVID-19 related lockdowns** (when sport and neighbourhood

closures were in effect; March 2020- June 2020; January 2021 - May 2021)? **Please respond as you have in previous questions of the survey, from YOUNGEST to OLDEST.**

|             | Less than 30<br>minutes per day<br>(1) | 30-59 minutes per<br>day (2) | 60-149 minutes<br>per day (4) | 150 minutes or<br>more per day (5) |
|-------------|----------------------------------------|------------------------------|-------------------------------|------------------------------------|
| Child 1 (1) | <input type="radio"/>                  | <input type="radio"/>        | <input type="radio"/>         | <input type="radio"/>              |
| Child 2 (2) | <input type="radio"/>                  | <input type="radio"/>        | <input type="radio"/>         | <input type="radio"/>              |
| Child 3 (3) | <input type="radio"/>                  | <input type="radio"/>        | <input type="radio"/>         | <input type="radio"/>              |
| Child 4 (4) | <input type="radio"/>                  | <input type="radio"/>        | <input type="radio"/>         | <input type="radio"/>              |
| Child 5 (5) | <input type="radio"/>                  | <input type="radio"/>        | <input type="radio"/>         | <input type="radio"/>              |
| Child 6 (6) | <input type="radio"/>                  | <input type="radio"/>        | <input type="radio"/>         | <input type="radio"/>              |
| Child 7 (7) | <input type="radio"/>                  | <input type="radio"/>        | <input type="radio"/>         | <input type="radio"/>              |

*Display This Question:*

*If How many children aged 0-13 years do you currently provide care for? = 7*

**Q5.23** In your opinion, how many **minutes per day** are your children engaging in physical activity **currently (i.e., at this moment in time)**? Please respond as you have in previous questions of the survey, from **YOUNGEST** to **OLDEST**.

|              | Less than 30<br>minutes per day<br>(1) | 30-59 minutes per<br>day (2) | 60-149 minutes<br>per day (4) | 150 minutes or<br>more per day (5) |
|--------------|----------------------------------------|------------------------------|-------------------------------|------------------------------------|
| Child 1 (1)  | <input type="radio"/>                  | <input type="radio"/>        | <input type="radio"/>         | <input type="radio"/>              |
| Child 2 (5)  | <input type="radio"/>                  | <input type="radio"/>        | <input type="radio"/>         | <input type="radio"/>              |
| Child 3 (6)  | <input type="radio"/>                  | <input type="radio"/>        | <input type="radio"/>         | <input type="radio"/>              |
| Child 4 (7)  | <input type="radio"/>                  | <input type="radio"/>        | <input type="radio"/>         | <input type="radio"/>              |
| Child 5 (8)  | <input type="radio"/>                  | <input type="radio"/>        | <input type="radio"/>         | <input type="radio"/>              |
| Child 6 (9)  | <input type="radio"/>                  | <input type="radio"/>        | <input type="radio"/>         | <input type="radio"/>              |
| Child 7 (10) | <input type="radio"/>                  | <input type="radio"/>        | <input type="radio"/>         | <input type="radio"/>              |

*Display This Question:*

*If How many children aged 0-13 years do you currently provide care for? = 8*

**Q5.24** In your opinion, **how many minutes per day** did your children spend engaged in physical activity during Ontario's **strictest COVID-19 related lockdowns** (when sport and neighbourhood

closures were in effect; March 2020- June 2020; January 2021 - May 2021)? **Please respond as you have in previous questions of the survey, from YOUNGEST to OLDEST.**

|             | Less than 30<br>minutes per day<br>(1) | 30-59 minutes per<br>day (2) | 60-149 minutes<br>per day (4) | 150 minutes or<br>more per day (5) |
|-------------|----------------------------------------|------------------------------|-------------------------------|------------------------------------|
| Child 1 (1) | <input type="radio"/>                  | <input type="radio"/>        | <input type="radio"/>         | <input type="radio"/>              |
| Child 2 (2) | <input type="radio"/>                  | <input type="radio"/>        | <input type="radio"/>         | <input type="radio"/>              |
| Child 3 (3) | <input type="radio"/>                  | <input type="radio"/>        | <input type="radio"/>         | <input type="radio"/>              |
| Child 4 (4) | <input type="radio"/>                  | <input type="radio"/>        | <input type="radio"/>         | <input type="radio"/>              |
| Child 5 (5) | <input type="radio"/>                  | <input type="radio"/>        | <input type="radio"/>         | <input type="radio"/>              |
| Child 6 (6) | <input type="radio"/>                  | <input type="radio"/>        | <input type="radio"/>         | <input type="radio"/>              |
| Child 7 (7) | <input type="radio"/>                  | <input type="radio"/>        | <input type="radio"/>         | <input type="radio"/>              |
| Child 8 (8) | <input type="radio"/>                  | <input type="radio"/>        | <input type="radio"/>         | <input type="radio"/>              |

*Display This Question:*

*If How many children aged 0-13 years do you currently provide care for? = 8*

**Q5.25 In your opinion, how many minutes per day are your children engaging in physical activity currently (i.e., at this moment in time)? Please respond as you have in previous questions of the survey, from YOUNGEST to OLDEST.**

|             | Less than 30<br>minutes per day<br>(1) | 30-59 minutes per<br>day (2) | 60-149 minutes<br>per day (4) | 150 minutes or<br>more per day (5) |
|-------------|----------------------------------------|------------------------------|-------------------------------|------------------------------------|
| Child 1 (1) | <input type="radio"/>                  | <input type="radio"/>        | <input type="radio"/>         | <input type="radio"/>              |
| Child 2 (2) | <input type="radio"/>                  | <input type="radio"/>        | <input type="radio"/>         | <input type="radio"/>              |
| Child 3 (3) | <input type="radio"/>                  | <input type="radio"/>        | <input type="radio"/>         | <input type="radio"/>              |
| Child 4 (4) | <input type="radio"/>                  | <input type="radio"/>        | <input type="radio"/>         | <input type="radio"/>              |
| Child 5 (5) | <input type="radio"/>                  | <input type="radio"/>        | <input type="radio"/>         | <input type="radio"/>              |
| Child 6 (6) | <input type="radio"/>                  | <input type="radio"/>        | <input type="radio"/>         | <input type="radio"/>              |
| Child 7 (7) | <input type="radio"/>                  | <input type="radio"/>        | <input type="radio"/>         | <input type="radio"/>              |
| Child 8 (8) | <input type="radio"/>                  | <input type="radio"/>        | <input type="radio"/>         | <input type="radio"/>              |
